# Supplementary material
Source: Springer Nature journal article supplement (https://www.springermedizin.de/resource/supplementary/12889_2011_3944_MOESM1_ESM.pdf/9491508)
Supplement: MOESM1 [file 9491508]

Year of birth

1949-1951

Conscription

1969-1970

Follow-up

1970-2004

Death

*Violent offending or victimization*

*Covariates prior or at  
conscription:*

- Parental divorce
- Conduct problems at school
- Ever run away from home
- Contact with the police or  
juvenile authorities
- Tobacco smoking
- Problem drinking
- Drug misuse

*Psychosocial  
characteristics measured  
at conscription:*

- Psychiatric diagnosis
- Emotional control
- Social maturity

*Hospital care:*

- Psychiatric diagnosis
- Alcohol or drug-related diagnosis
